# Supplementary material
Source: PubMed Central journal article supplement (PMC4213651)
Supplement: rspb20141860supp1.pdf [file rspb20141860supp1.pdf]

**ESM 1 - Table of occurrence of elements types across populations**

| Sturdy et al. 1999 | JH | QB | R  | QP | Leadbeater et al. 2005                    | Zann 1993                                                                                                      | Holveck et al. 2008       | Price 1979           |
|--------------------|----|----|----|----|-------------------------------------------|----------------------------------------------------------------------------------------------------------------|---------------------------|----------------------|
|                    | *  | *  | *  | *  | #                                         | *                                                                                                              | *                         | *                    |
| combination note   | 36 | 3  | 4  | 14 | combination note 60                       | distance call 16                                                                                               | -                         | long call 27         |
| slide note         | 9  | 35 | 22 | 16 | slide note 95                             | downslur 2                                                                                                     | down sweep 53             | -                    |
| flat note          | 9  | 20 | 21 | 10 | flat note 90                              | tone 1<br>stack 17                                                                                             | tone 17<br>stack 9        | medium call 9        |
| <i>short slide</i> | 37 | 35 | 44 | 44 | -                                         | <i>introductory element</i> 24<br><i>introductory dyad</i> 2                                                   | -                         | <i>short call</i> 31 |
| high               | 9  | 7  | 9  | 16 | inspiratory high 45<br>expiratory high 60 | high 10                                                                                                        | high 3<br>high sweep 1    | non-call type 32     |
| -                  |    |    |    |    | noise 10                                  | noise-noise 7<br>noise-structure 4<br>ladder-noise 4<br>tone-niose 3<br>noise-DC 3<br>noise-tone 3<br>n-n-DC 1 | noisy 11<br>short noisy 1 |                      |
| -                  |    |    |    |    | buzz 5                                    | -                                                                                                              | trill 3                   |                      |

**ESM Table 1.** Elements described in the literature. The different studies used different classification systems causing some categories to fall into two categories in one study and into one category in another study (for instance inspiratory and expiratory high notes in Leadbeater et al., are grouped in to ‘high notes’ according to Sturdy et al.’s classification. In order to compare studies, Sturdy et al. is used as a reference point and element types on the same row are expected to be similar to a certain extend. This table was used as an estimate to classify elements into ‘more’ or ‘less’ common for constructing the stimuli. Introduction notes and/or short slides are indicated in *italic* since introduction notes are not always included in the motif thus this makes comparison not ideal. Frequency of note types from different colonies are given in % (\* : % of total nr of elements, #: % of motives containing a specific element). The investigated colonies are from Pennsylvania, U.S.A. (1), Alice Springs and Murray River, Australia (2, 3), Utah, U.S.A. (4), Leiden, the Netherlands (5) and the following 4 colonies by Sturdy et al. (6): JH: John Hopkins, QB: Queen's biology, R: Rockefeller, QP: Queen's psychology.

## References

1. Price PH (1979) Developmental determinants of structure in zebra finch song *Journal of Comparative and Physiological Psychology* 93(2):260-277.
  2. Zann R (1993) Structure, sequence and evolution of song elements in wild Australian zebra finches. *Auk* 110(4):702-715.
  3. Zann R (1996) *The zebra finch : a synthesis of field and laboratory studies* (Oxford Ornithology Series, New York).
  4. Leadbeater E, Goller F, & Riebel K (2005) Unusual phonation, covarying song characteristics and song preferences in female zebra finches. *Animal Behaviour* 70:909-919.
  5. Holveck MJ, de Castro ACV, Lachlan RF, ten Cate C, & Riebel K (2008) Accuracy of song syntax learning and singing consistency signal early condition in zebra finches. *Behav. Ecol.* 19(6):1267-1281.
  6. Sturdy CB, Phillmore LS, & Weisman RG (1999) Note types, harmonic structure, and note order in the songs of zebra finches (*Taeniopygia guttata*). *Journal of Comparative Psychology* 113(2):194-203.
-

## ESM2 - Statistical details

### *Preference test 35dph*

16 birds were tested, of which 4 did not show a response and had to be excluded for the statistics for 35days. When a bird sat on the same perch during a whole test this was counted as a lack of response and the test was excluded. Several subtests also had to be excluded throughout age groups due to lack of response. Statistics were performed on the remaining 12 birds with 27 subtests in total. A linear mixed effect model was performed with time spent on each side of the cage as dependent variable, stimulus type (common/uncommon) as fixed factor, subject as random factor and subtest nested within subject.

Results for model comparison with (model2) or without (model1) stimulus type are listed below:

|        | Model | df | AIC      | BIC      | logLik    | Test   | L.Ratio  | p-value |
|--------|-------|----|----------|----------|-----------|--------|----------|---------|
| Model1 | 1     | 4  | 740.2076 | 748.1635 | -366.1038 |        |          |         |
| Model2 | 2     | 5  | 735.3988 | 745.3437 | -362.6994 | 1 vs 2 | 6.808736 | 0.0091  |

### *Preference test from age 35dph to 55dph*

A linear mixed effect model was performed for test on all ages, with time spent on each side of the cage as dependent variable, stimulus type (common/uncommon), tutor type (common tutor/uncommon tutor), age(35,45,55dph) and tutor/nontutor as fixed factors, subject as random factor and subtest nested within subject.

Model comparison for an interaction between stimulus type x tutor type x age x tutor/non-tutor:

|         | Model | df | AIC      | BIC      | logLik   | Test   | L.Ratio  | p-value |
|---------|-------|----|----------|----------|----------|--------|----------|---------|
| Model 1 | 1     | 25 | 3607.139 | 3696.347 | -1778.57 |        |          |         |
| Model 2 | 2     | 27 | 3603.703 | 3700.048 | -1774.85 | 1 vs 2 | 7.435687 | 0.0243  |

### *Age 55*

Since a 4-way interaction as found, data were split in order to inspect the 55dph in more detail. A linear mixed effect model was performed with time spent on each side of the cage as dependent variable, stimulus type (common/uncommon), tutor type (common tutor/uncommon tutor) and tutor/non-tutor as fixed factors, subject as random factor and subtest nested within subject.

Model comparison for an interaction between stimulus type x tutor type x tutor/non-tutor:

|         | Model | df | AIC      | BIC      | logLik   | Test   | L.Ratio  | p-value  |
|---------|-------|----|----------|----------|----------|--------|----------|----------|
| Model 1 | 1     | 10 | 1577.137 | 1604.499 | -778.568 |        |          |          |
| Model 2 | 2     | 11 | 1565.085 | 1595.183 | -771.542 | 1 vs 2 | 14.05206 | 2.00E-04 |

We further spilt up the data to see if the difference in preference between common song stimuli and uncommon song stimuli was similar for tutor songs and non-tutor song. A linear mixed effect model was performed with time spent on each side of the cage as dependent variable, stimulus type (common/uncommon) and tutor type (common tutor/uncommon tutor) as fixed factors, subject as random factor and subtest nested within subject.

Model comparison for tutor songs stimulus type x tutor type:

|         | Model | df | AIC      | BIC      | logLik  | Test   | L.Ratio  | p-value |
|---------|-------|----|----------|----------|---------|--------|----------|---------|
| Model 1 | 1     | 6  | 375.3506 | 382.8992 | 181.675 |        |          |         |
| Model 2 | 2     | 7  | 357.1205 | 365.9271 | -171.56 | 1 vs 2 | 20.23017 | <.0001  |

Model comparison for non-tutor songs stimulus type x tutor type:

|         | Model | df | AIC      | BIC      | logLik   | Test   | L.Ratio  | p-value |
|---------|-------|----|----------|----------|----------|--------|----------|---------|
| Model 1 | 1     | 6  | 1210.555 | 1225.419 | -599.278 |        |          |         |
| Model 2 | 2     | 7  | 1212.326 | 1229.667 | -599.163 | 1 vs 2 | 0.229157 | 0.6321  |

We also tested the difference between tutor song and non-tutor song stimuli was similar for birds tutored with common song and those tutored with uncommon song. A linear mixed effect model was performed with time spent on each side of the cage as dependent variable, stimulus type (common/uncommon) and tutor/non-tutor as fixed factors, subject as random factor and subtest nested within subject.

Model comparison for the group tutored with common songs testing for an interaction between stimulus type x tutor/non-tutor:

|         | Model | df | AIC      | BIC      | logLik   | Test   | L.Ratio  | p-value |
|---------|-------|----|----------|----------|----------|--------|----------|---------|
| Model 1 | 1     | 6  | 742.3163 | 754.2502 | -365.158 |        |          |         |
| Model 2 | 2     | 7  | 737.9239 | 751.8468 | -361.962 | 1 vs 2 | 6.392436 | 0.0115  |

Model comparison for the group tutored with uncommon songs testing for an interaction between stimulus type x tutor/non-tutor:

|         | Model | df | AIC      | BIC      | logLik   | Test   | L.Ratio  | p-value |
|---------|-------|----|----------|----------|----------|--------|----------|---------|
| Model 1 | 1     | 6  | 838.2477 | 850.8138 | -413.124 |        |          |         |
| Model 2 | 2     | 7  | 832.3889 | 847.0493 | -409.194 | 1 vs 2 | 7.858835 | 0.0051  |

### ESM 3 - Spectrograms of tutor-tutee pairs

Each page represents on tutor-tutee-pair, first birds tutored with less common songs (LC) then birds tutored with more common songs (MC). All spectrograms are presented here without introductory notes.

Less Common:

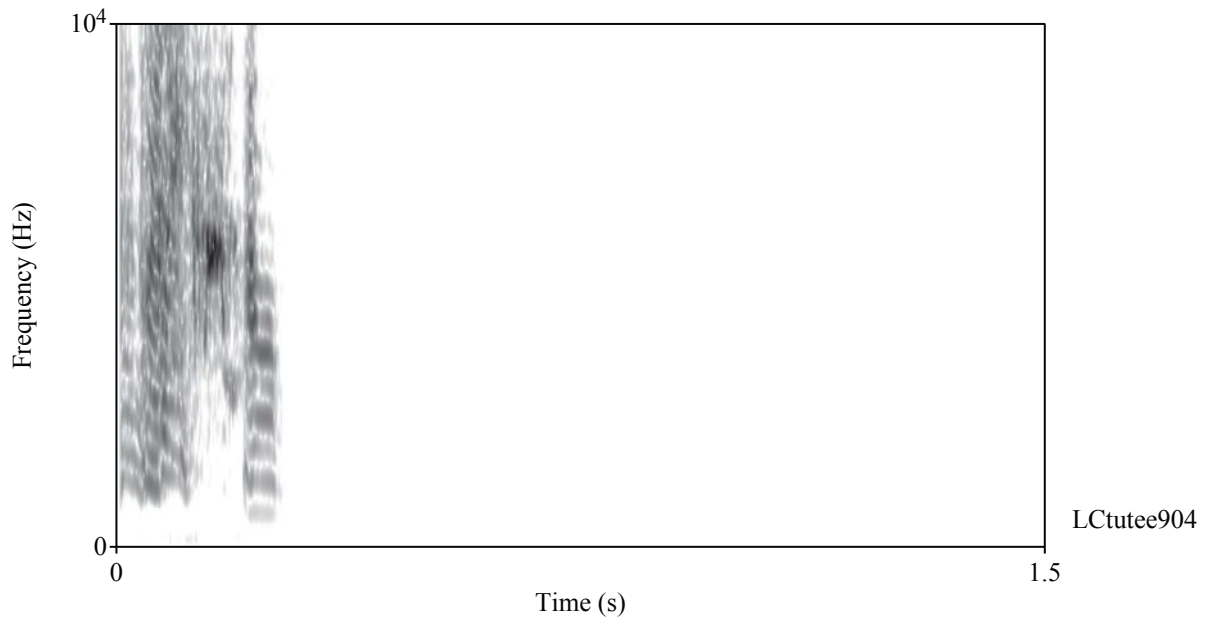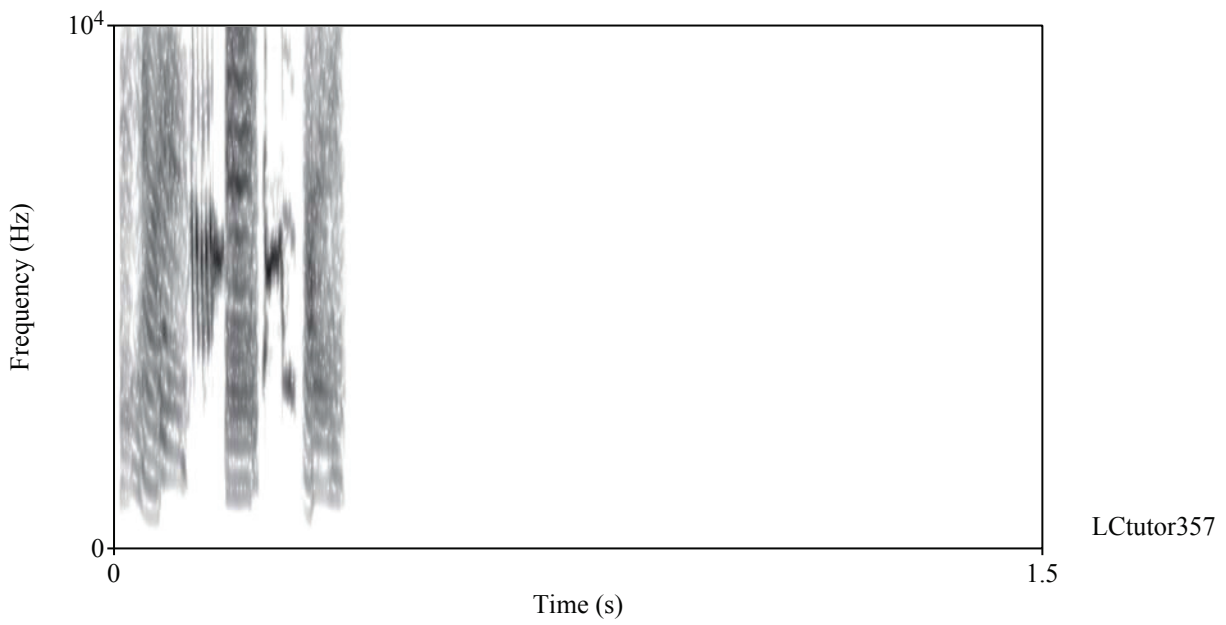

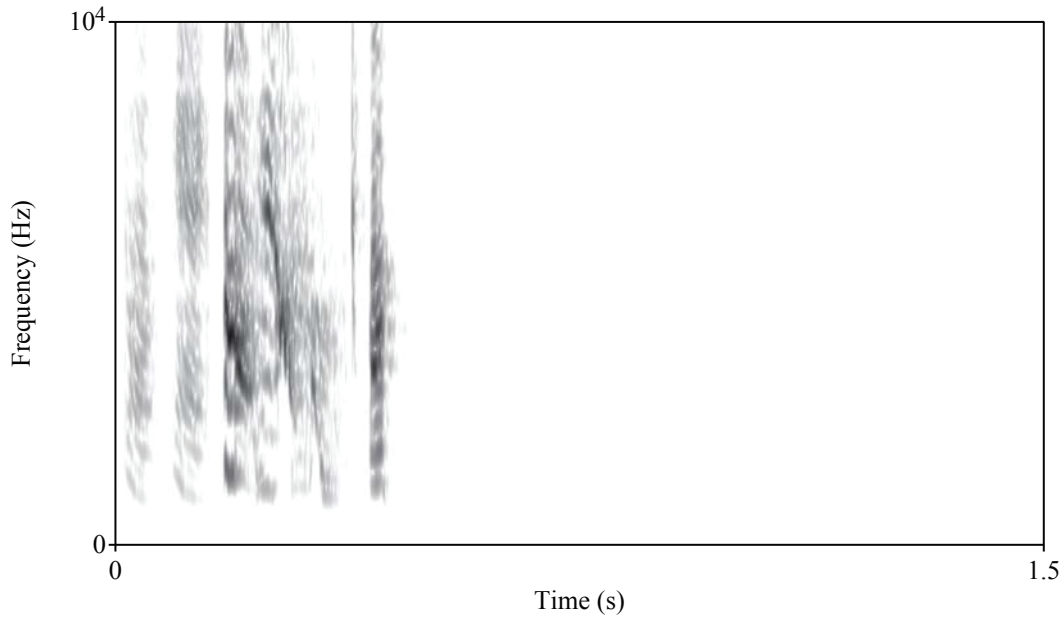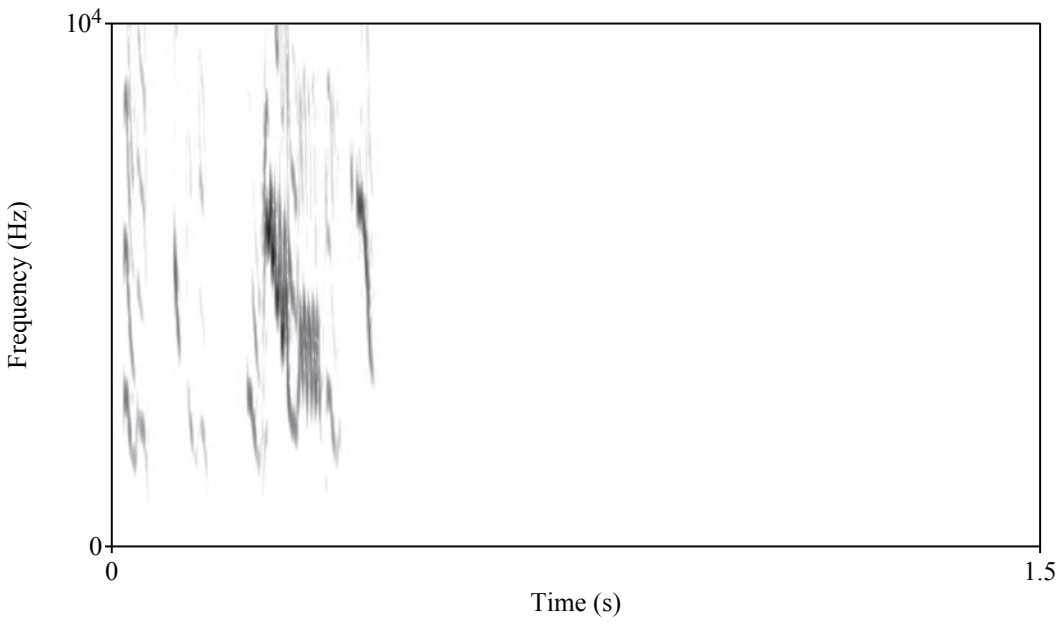

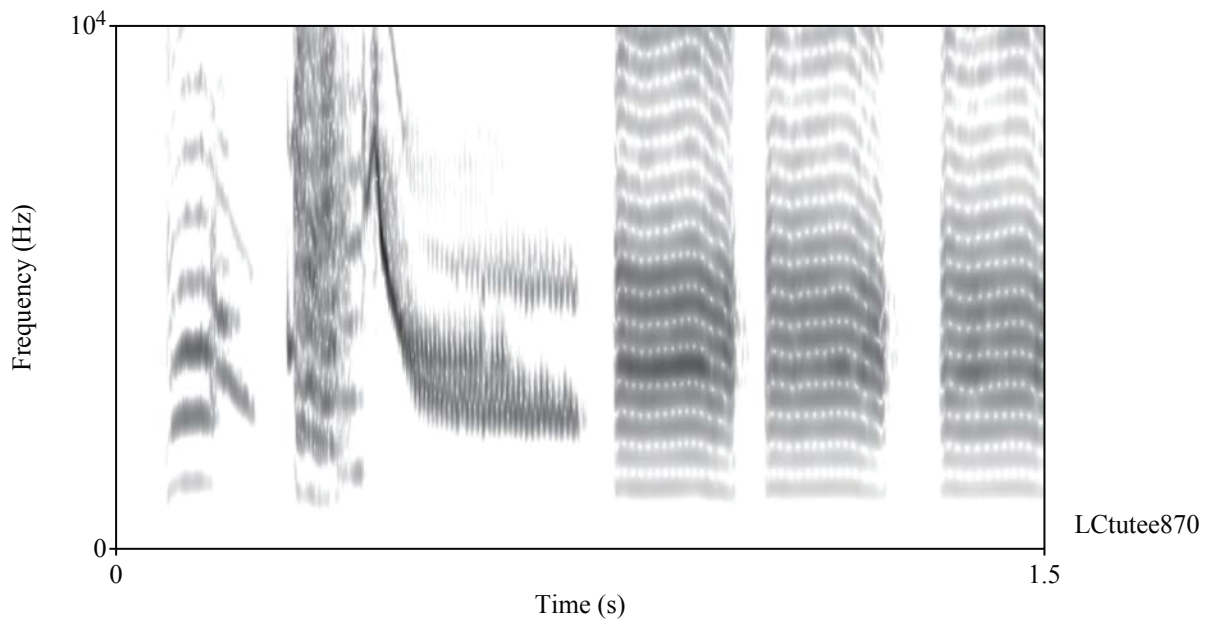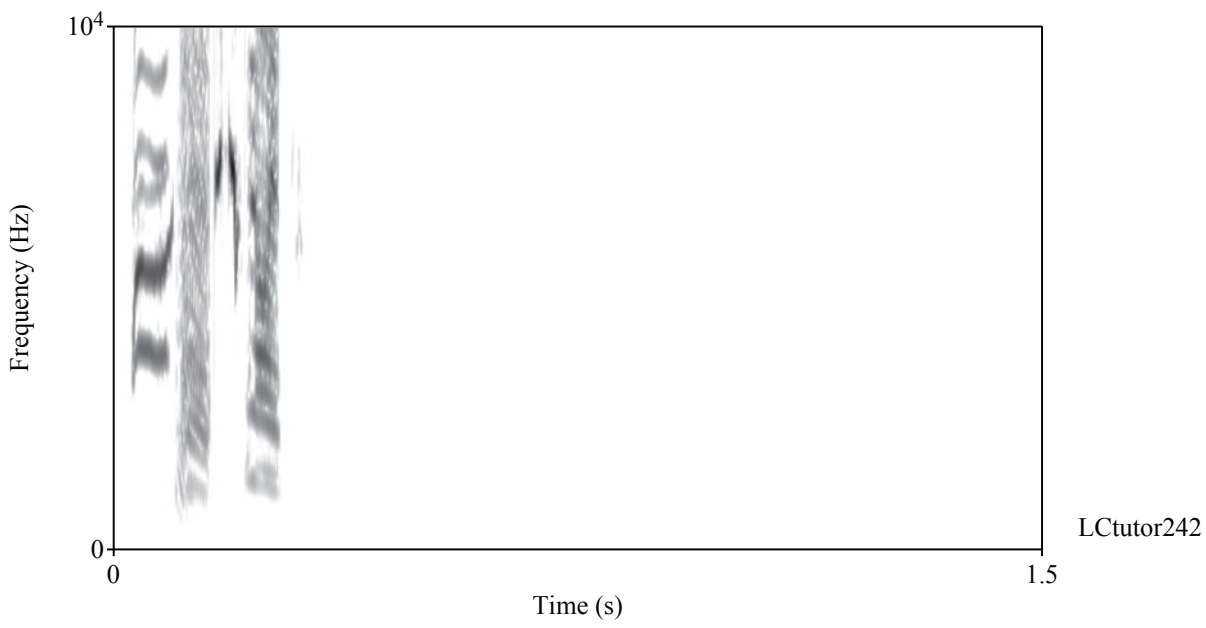

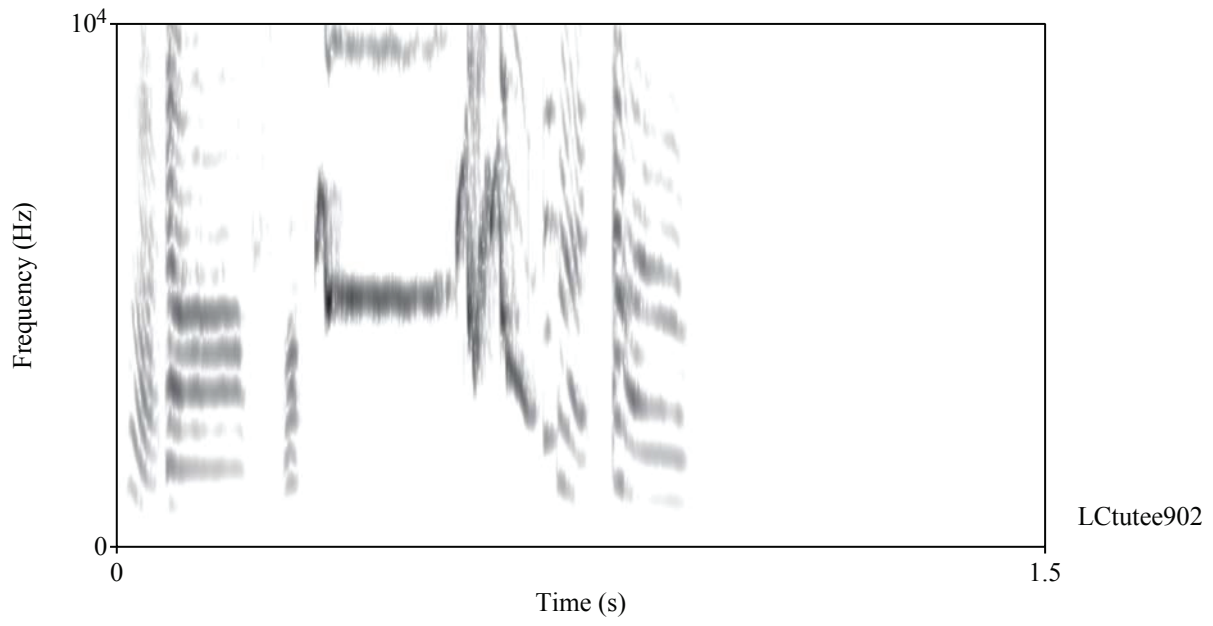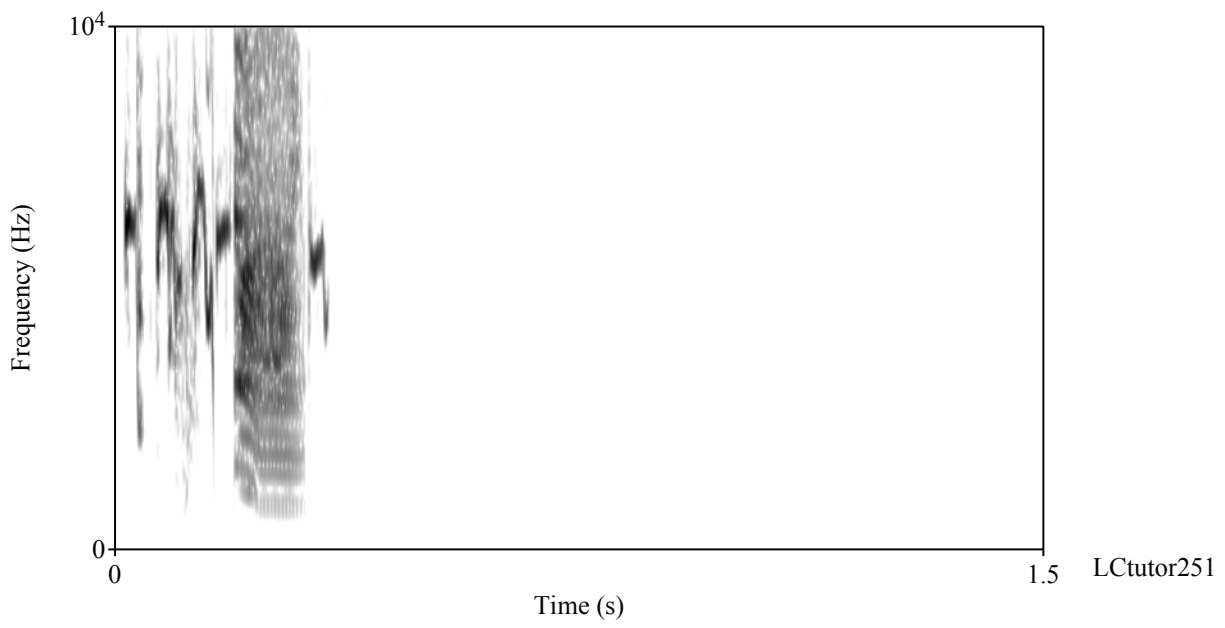



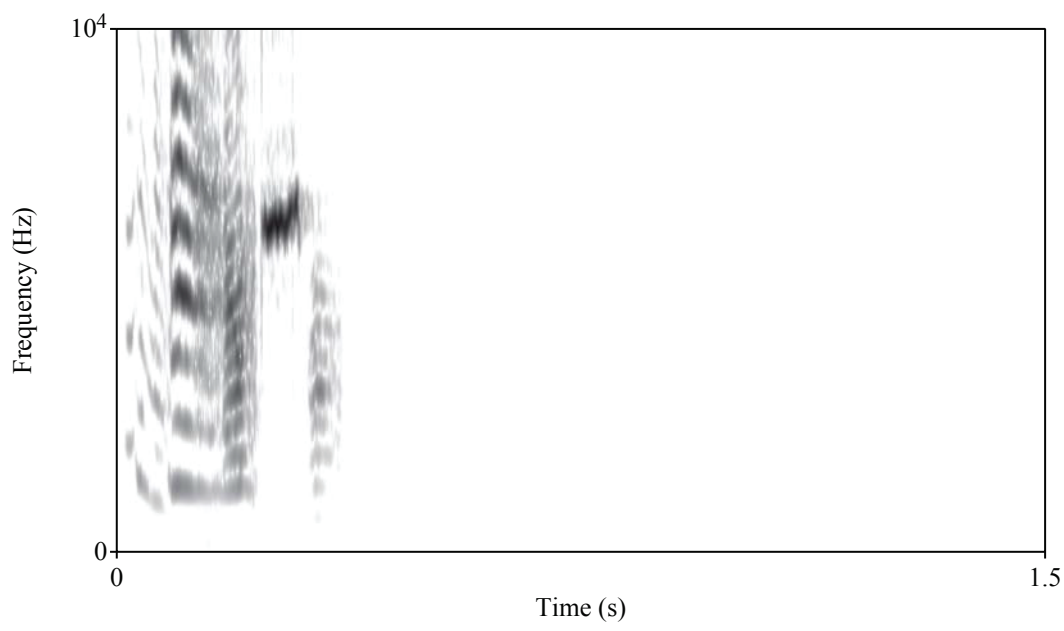

LCtutee883

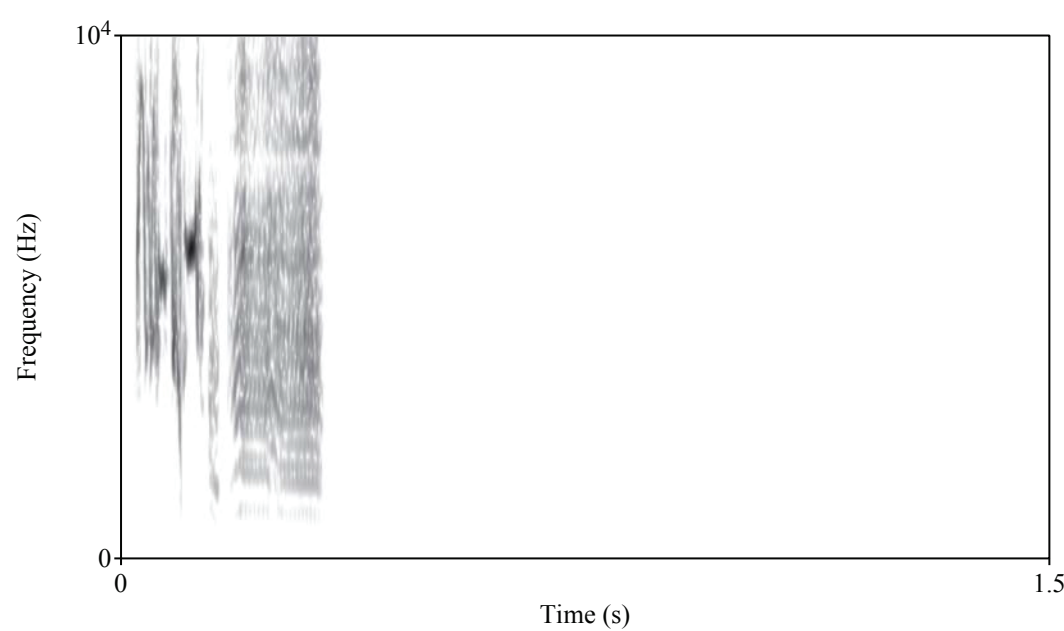

LCtutor270

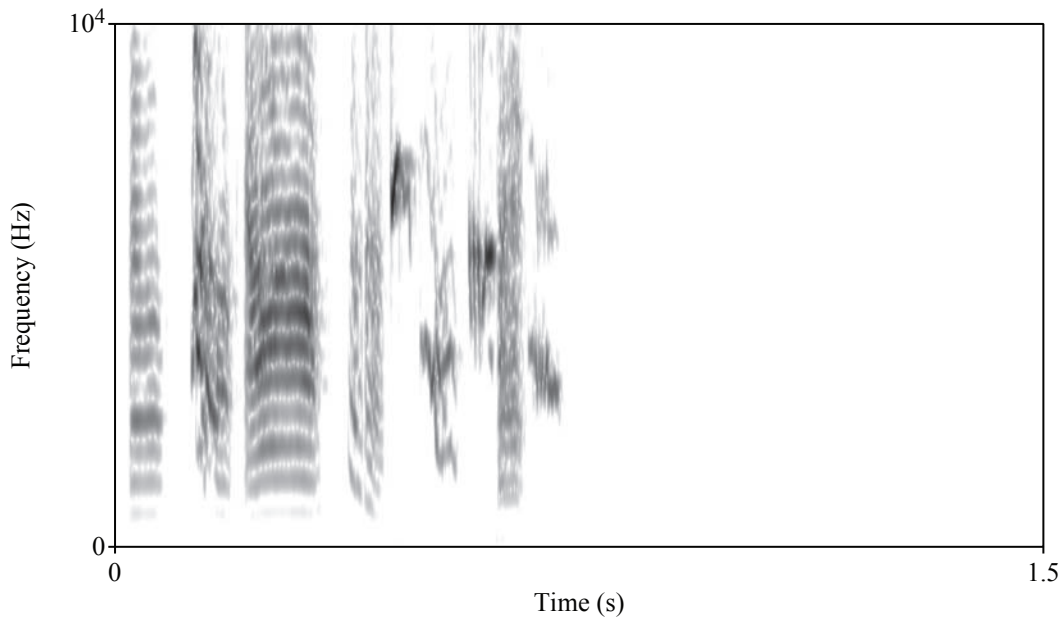

LCtutee901

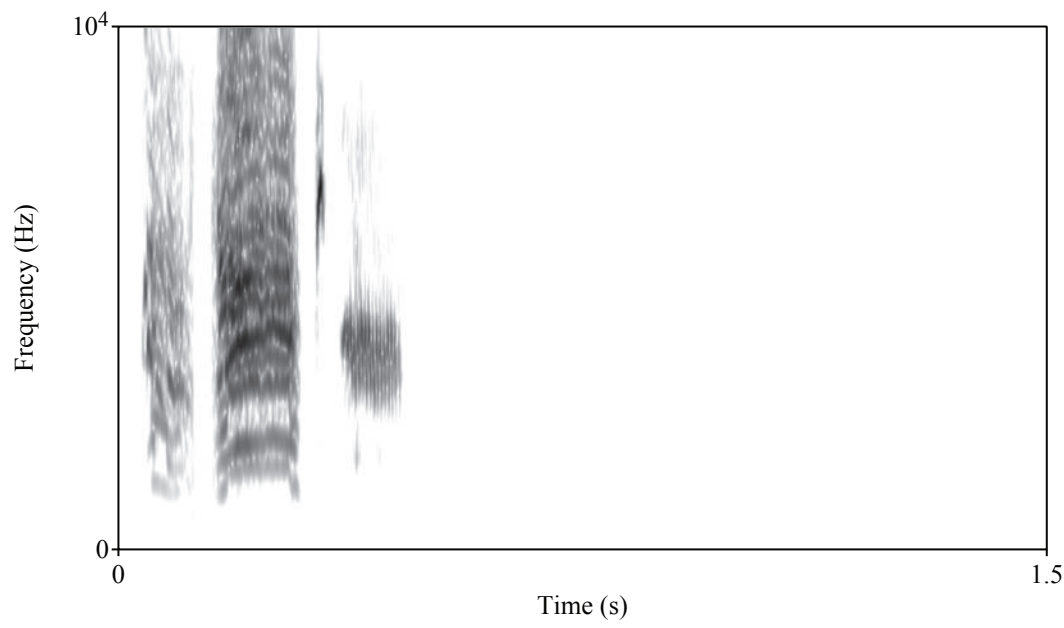

LCtutor337

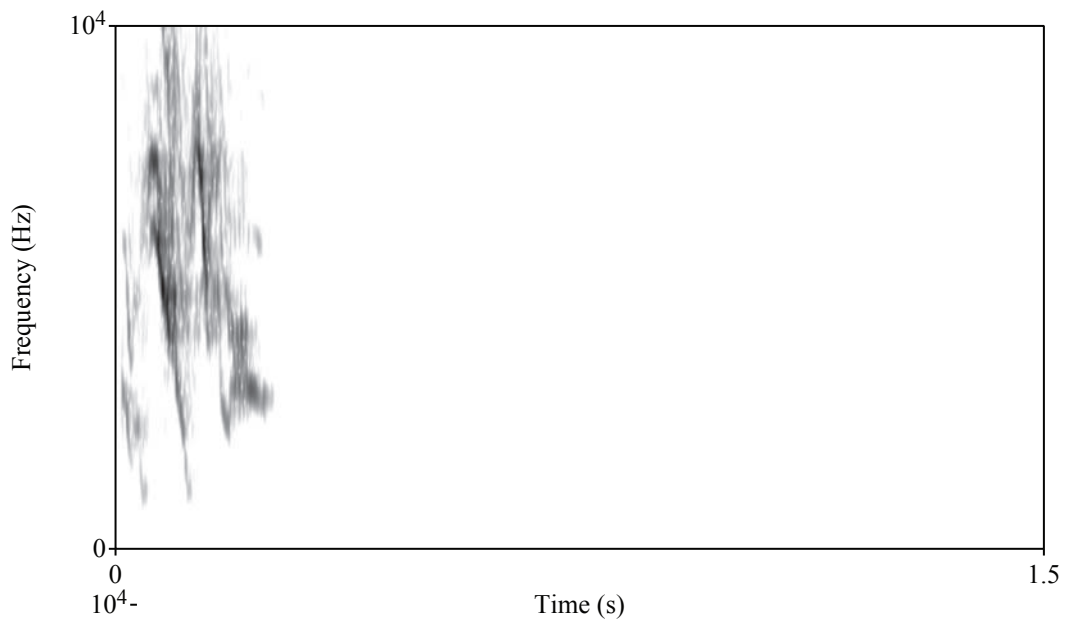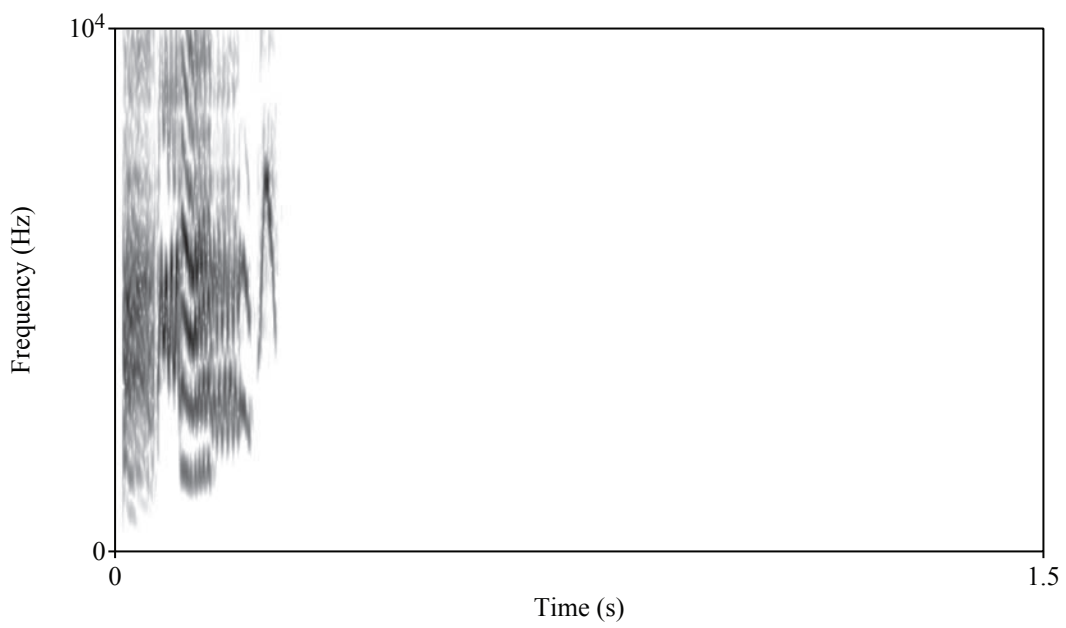

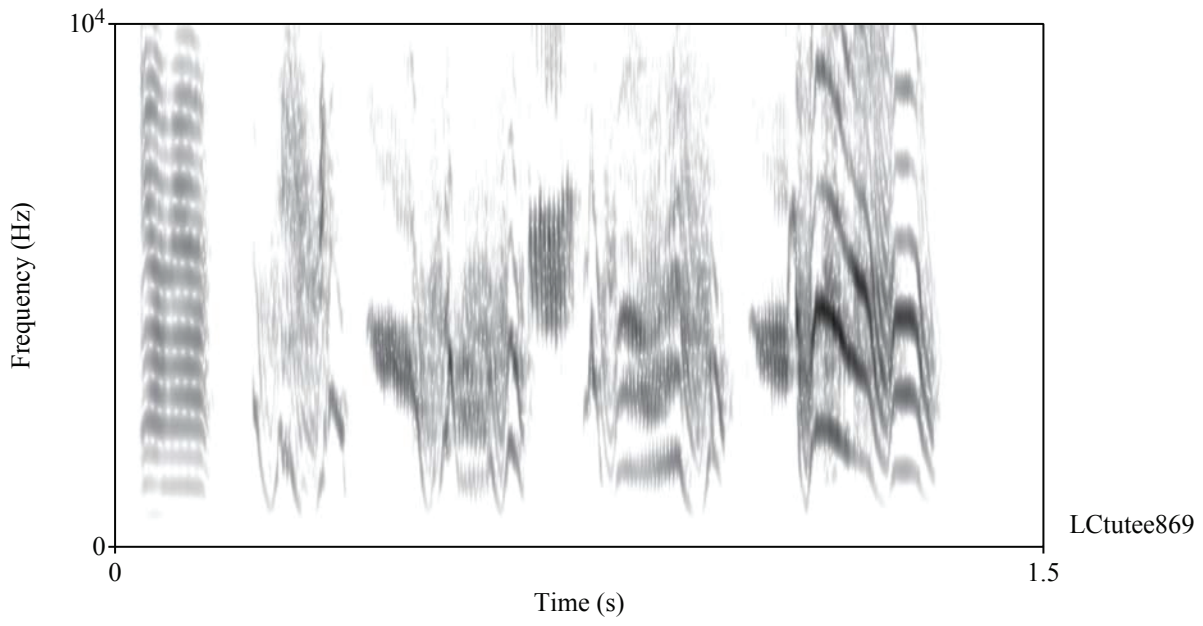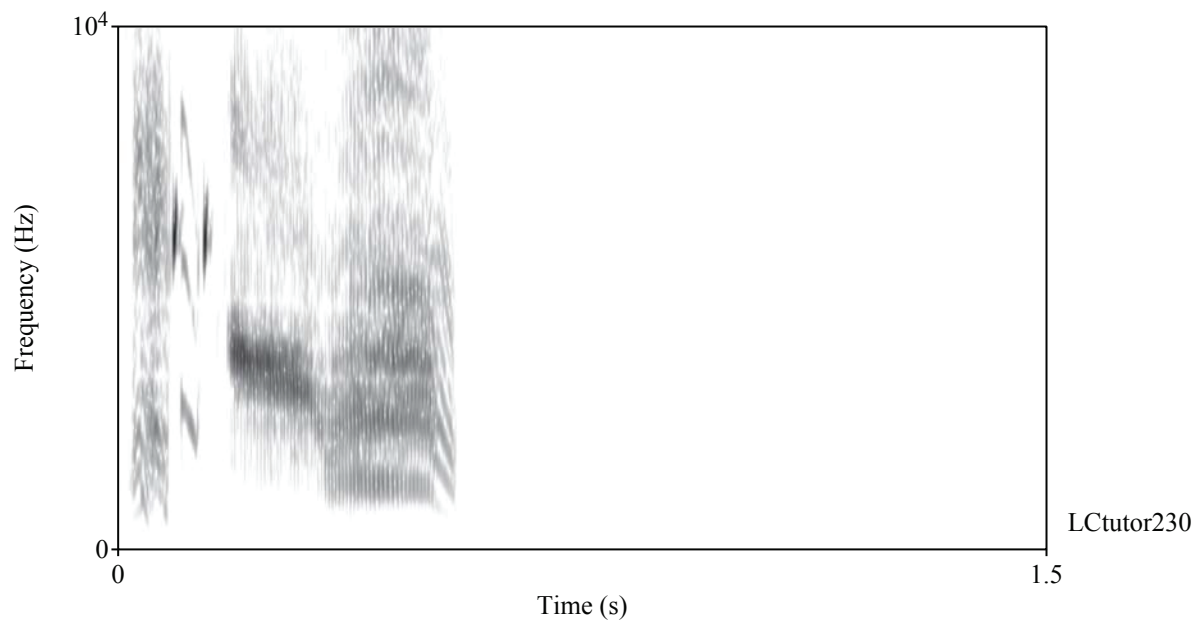

More Common:

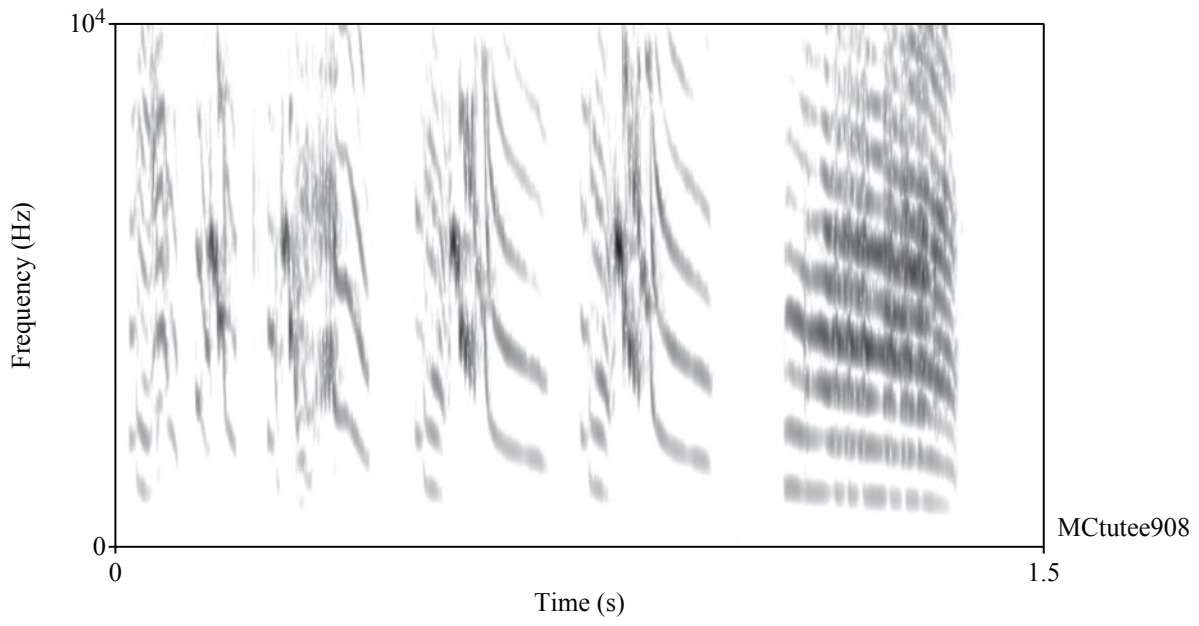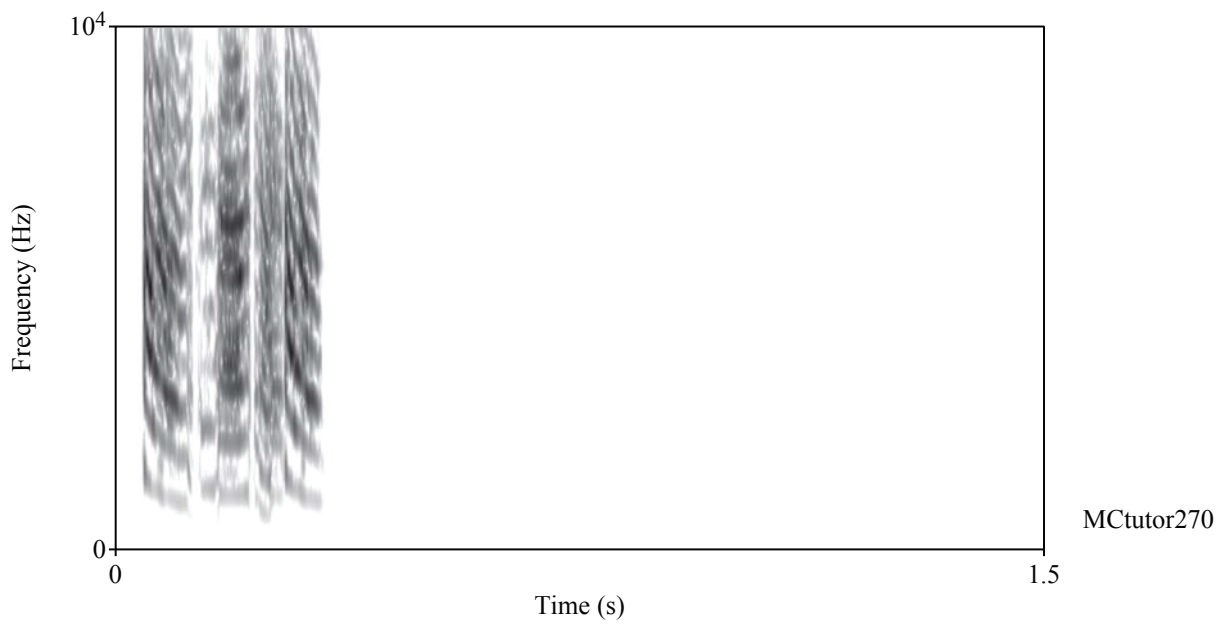

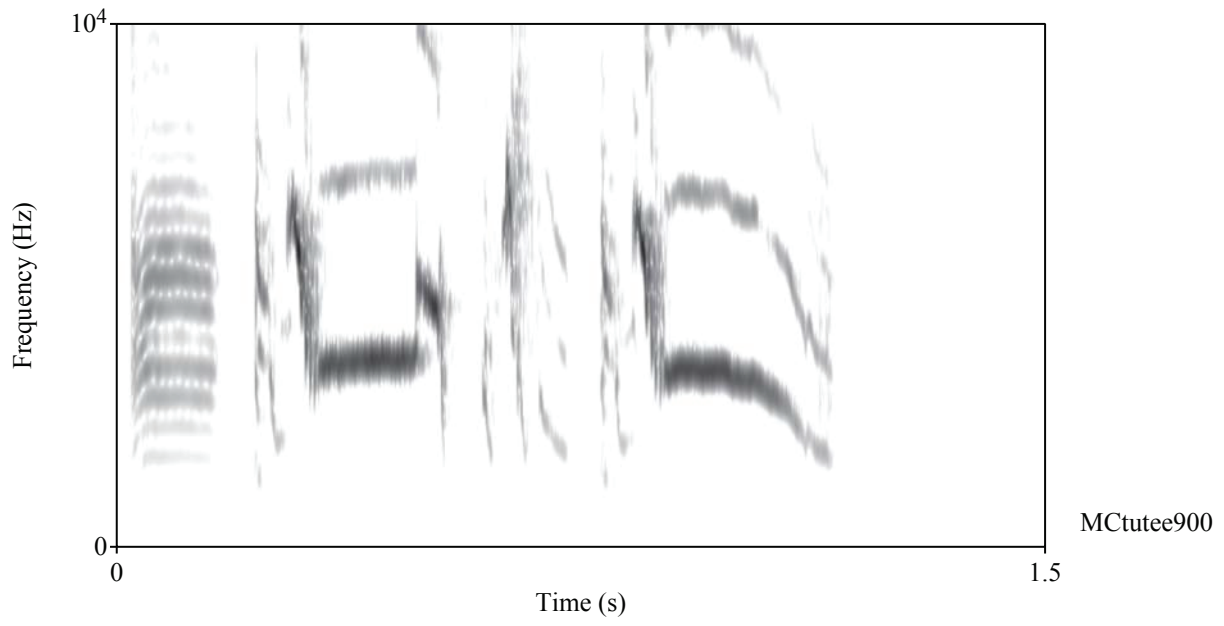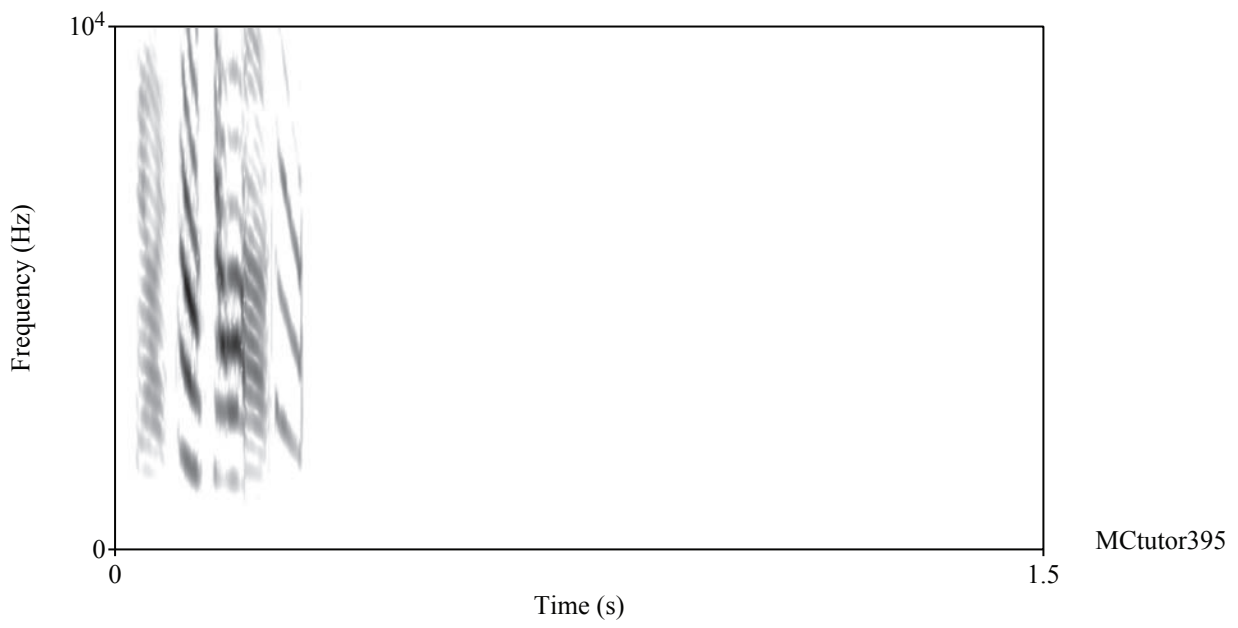

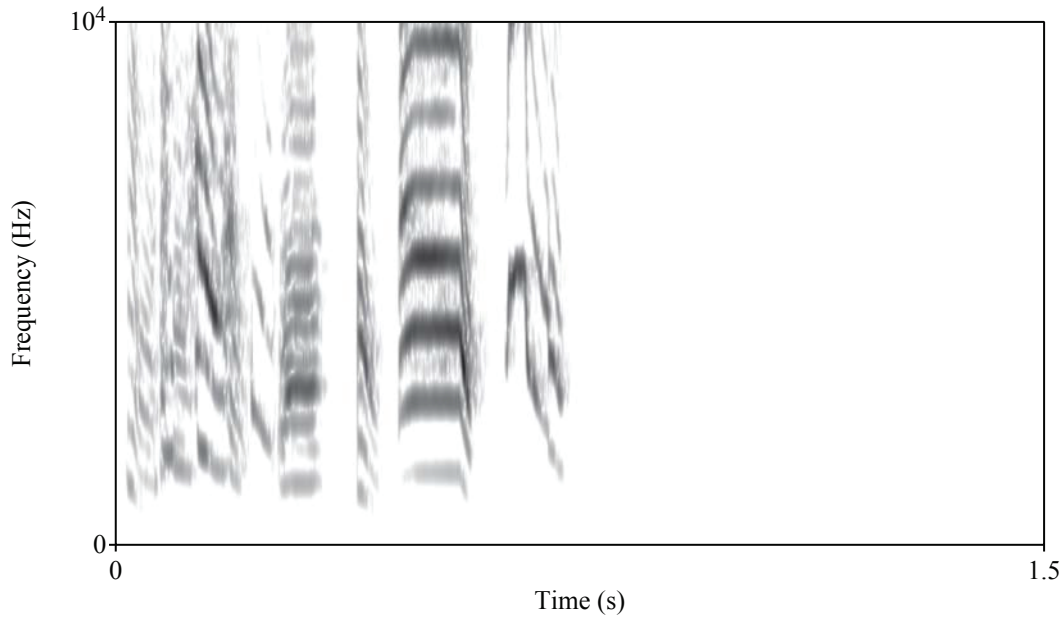

MCtutee864

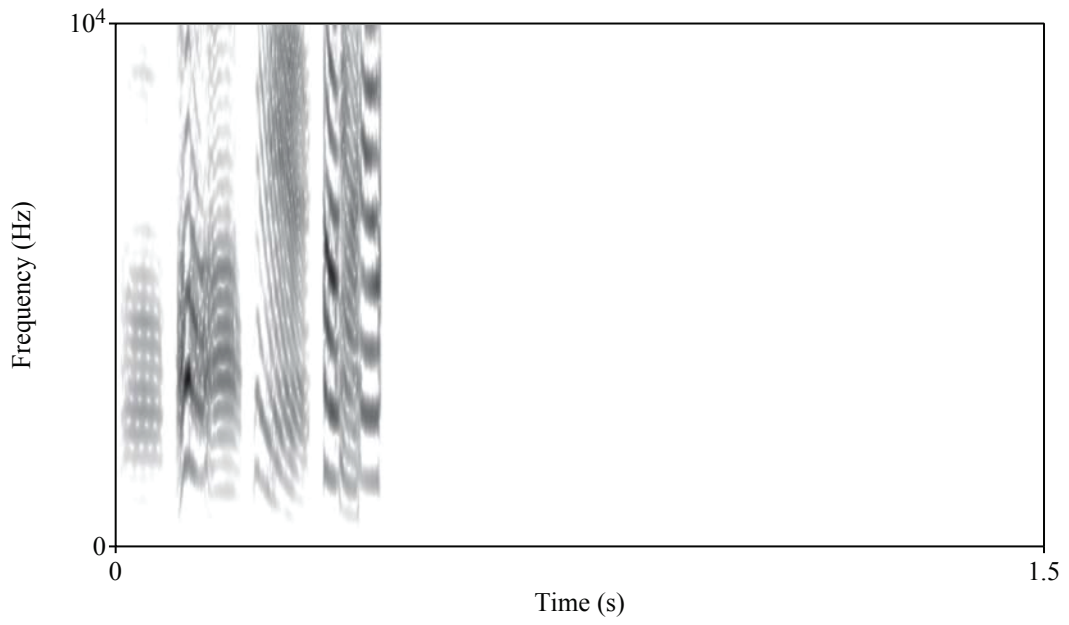

MCtutor357

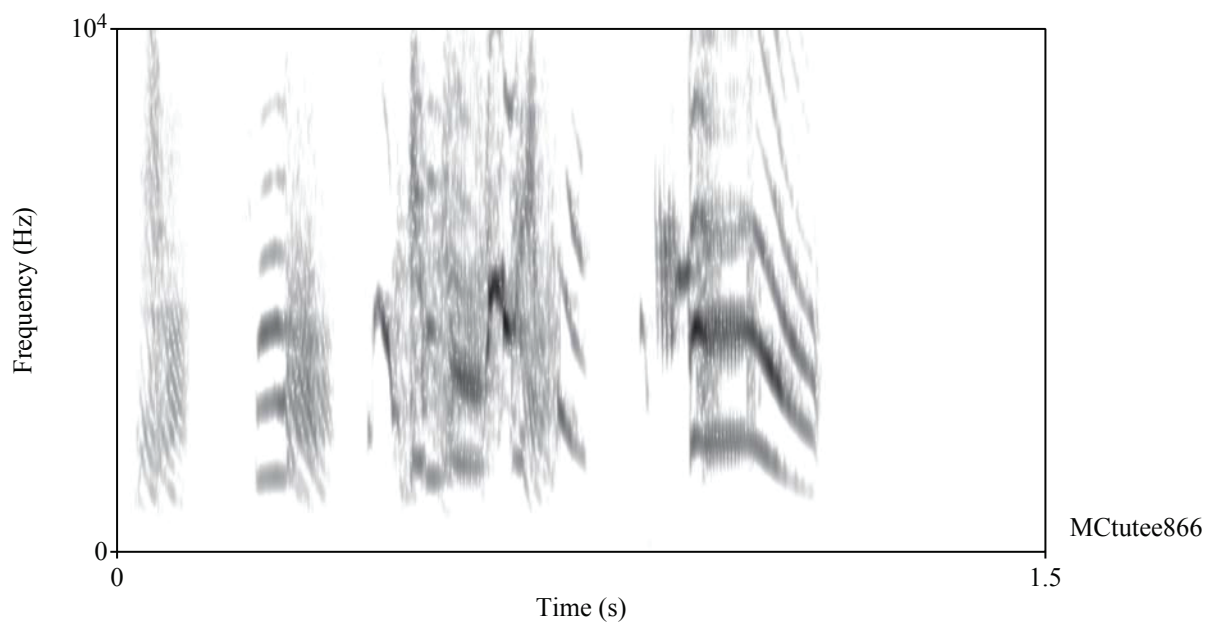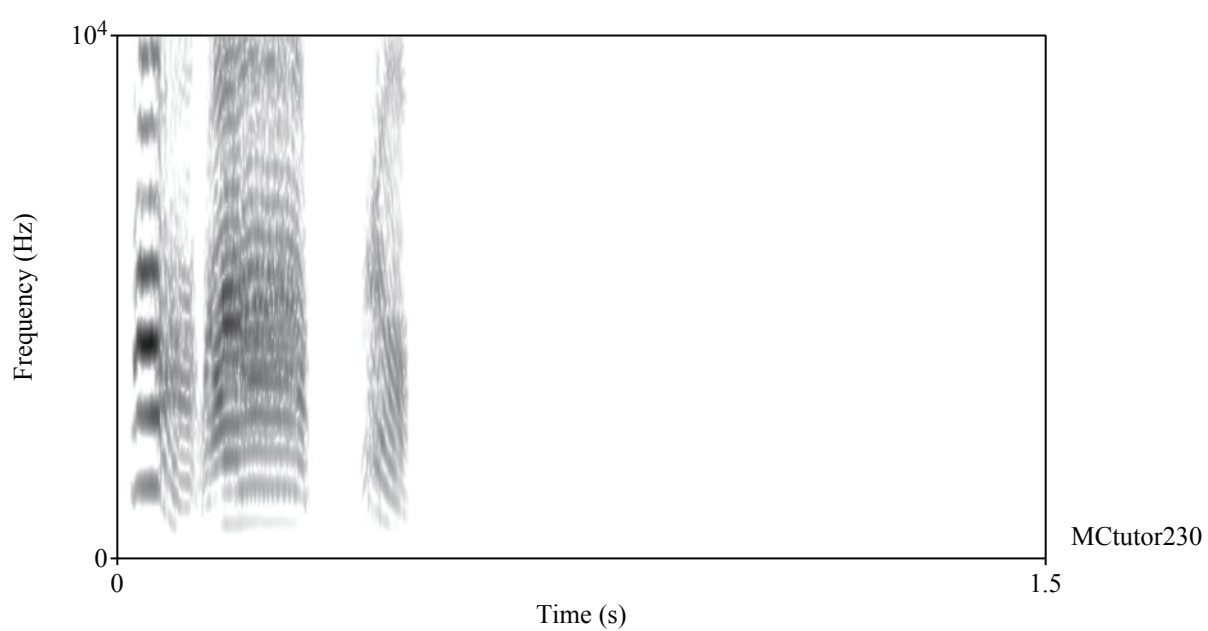



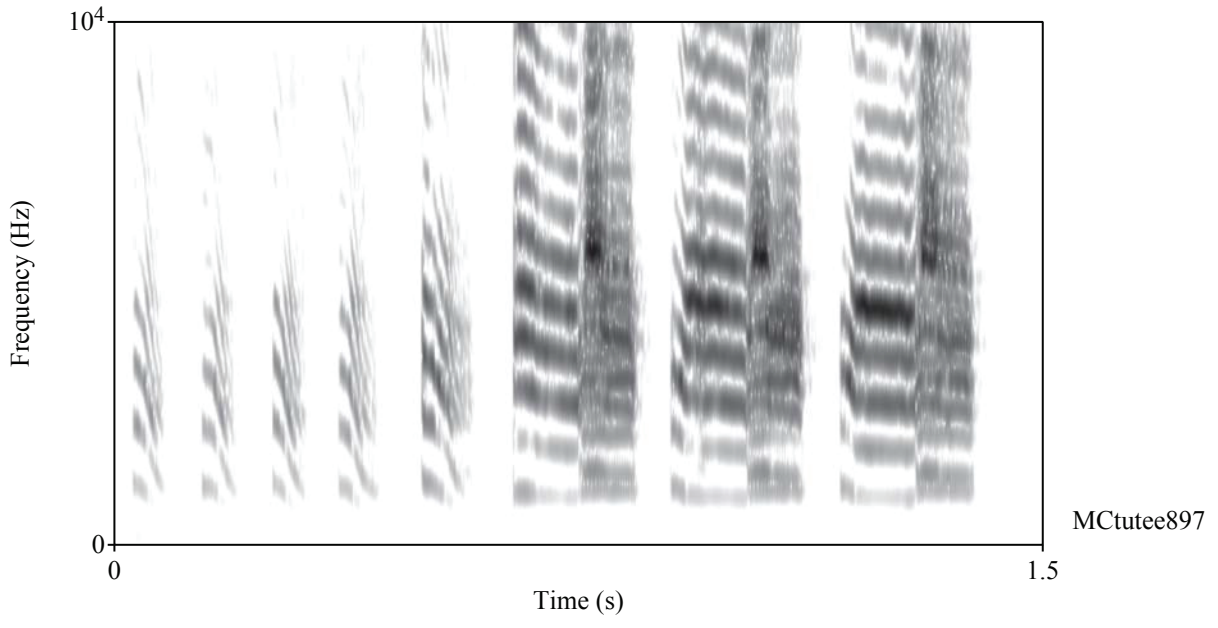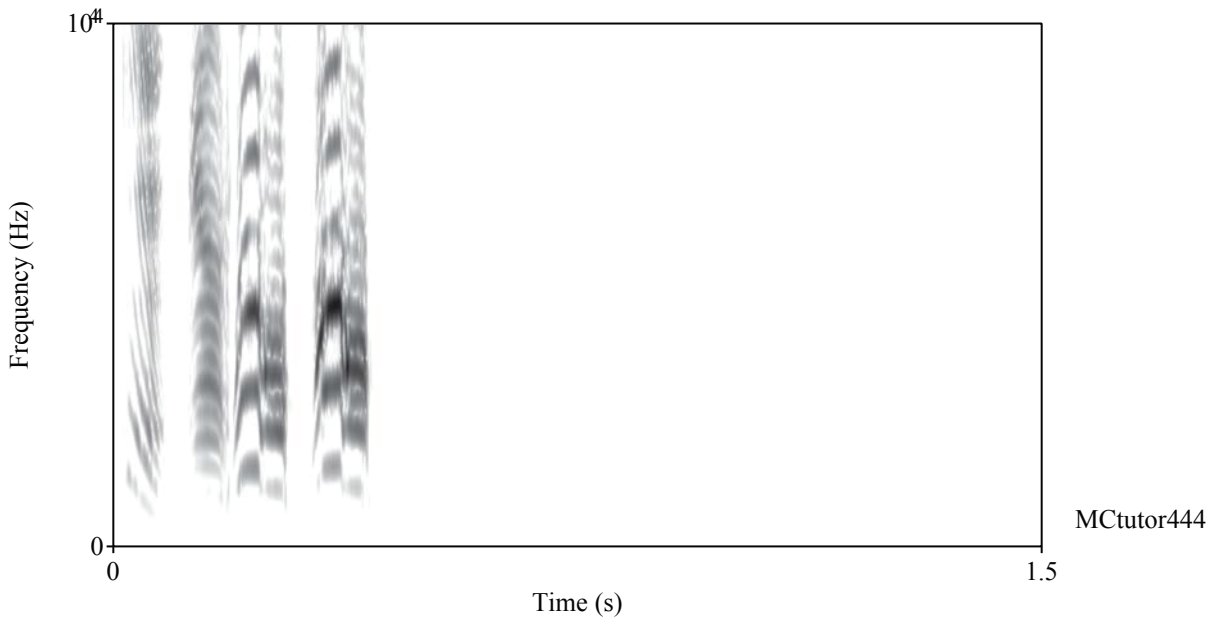

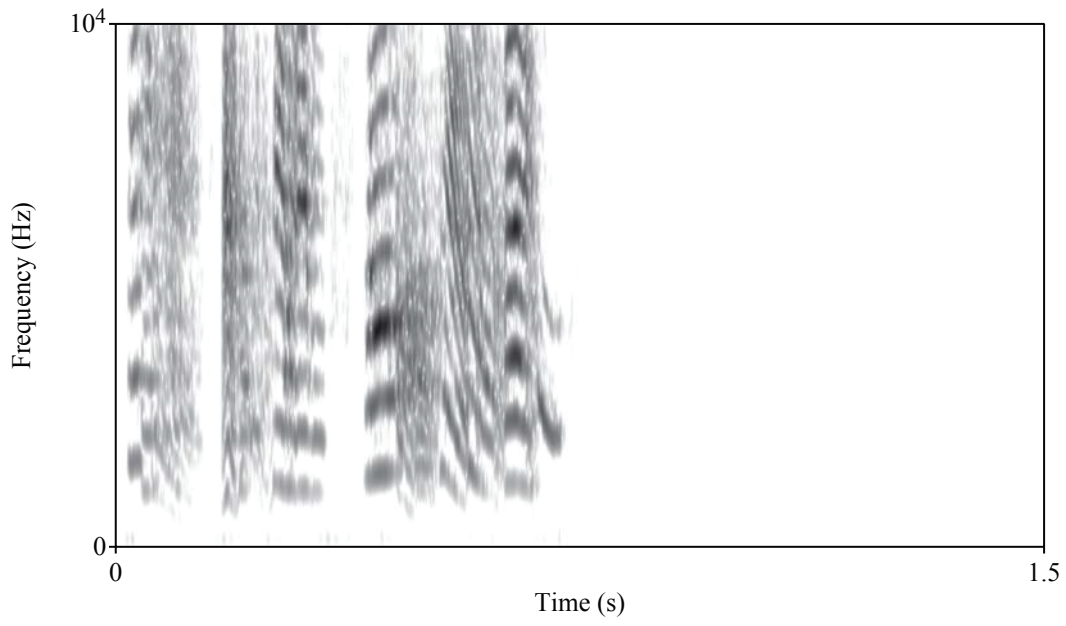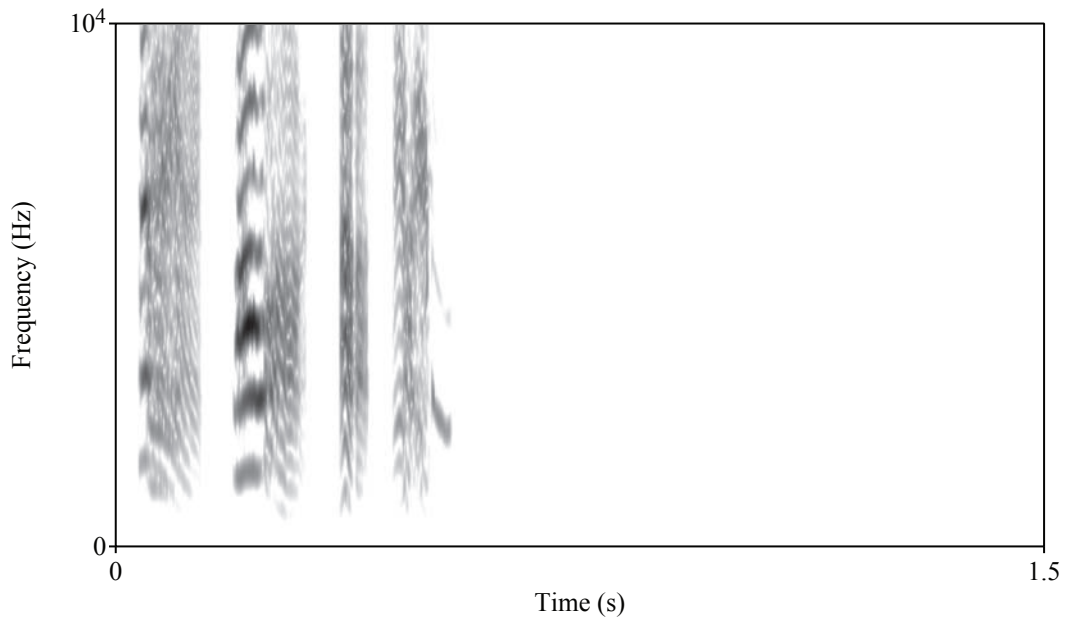

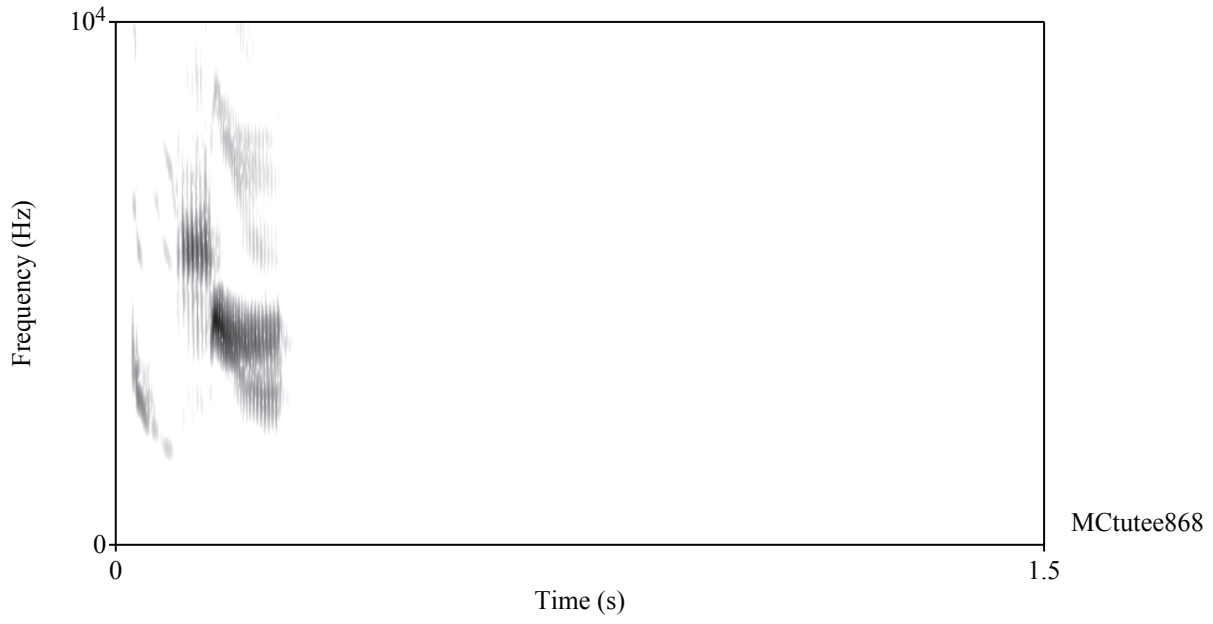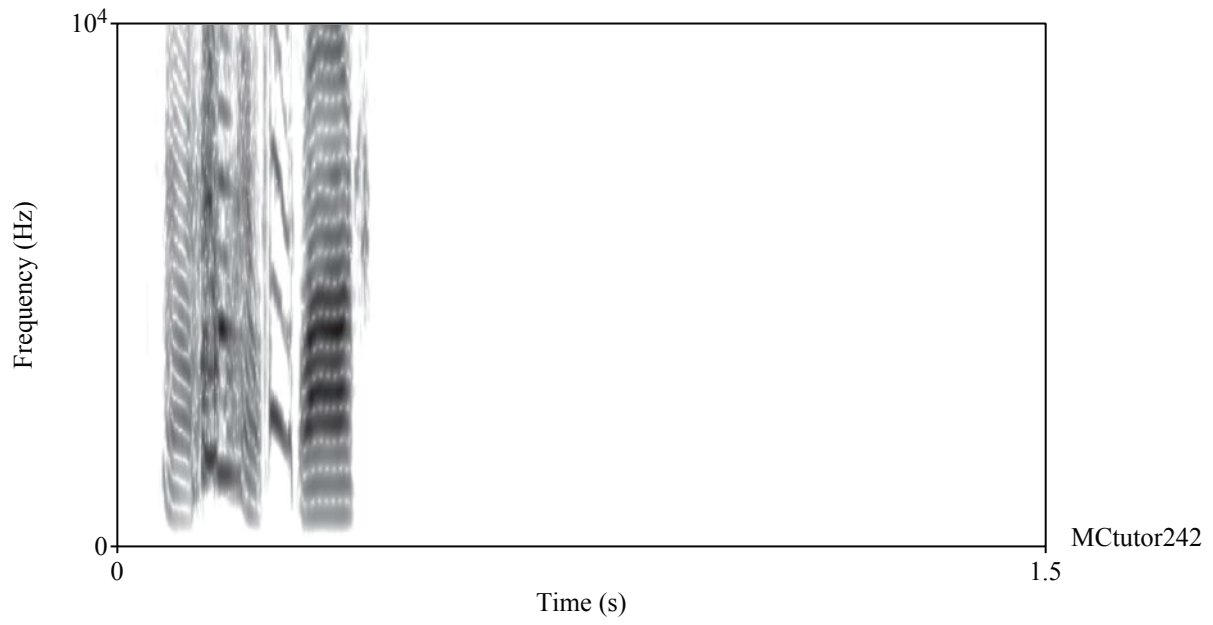

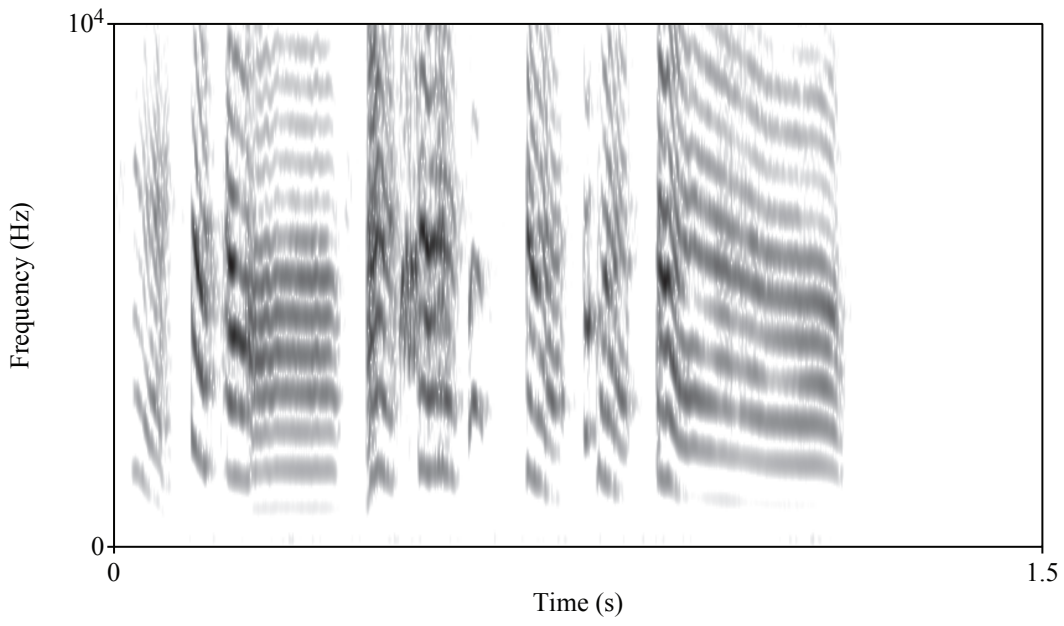

MCtutee878

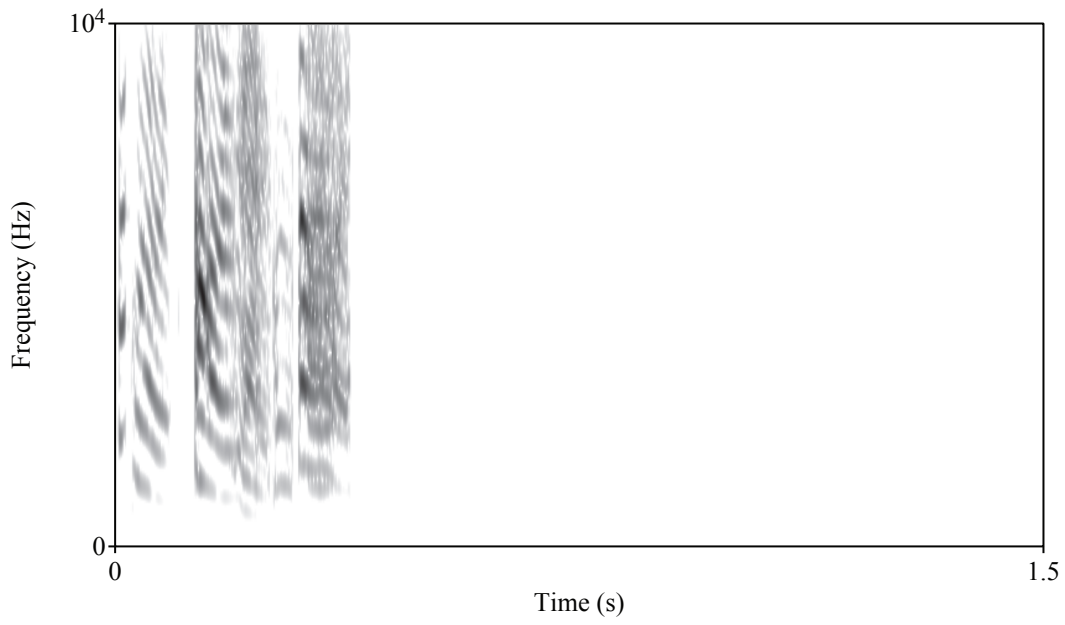

MCtutor251
